# Supplementary material for: RMP limits innate immune activation in macrophages by inhibiting IKKβ activity in sepsis
Source: Research Square preprint supplement (doi:10.21203/rs.3.rs-4324425/v1), 2024-06-04
Supplement: Supplementary file 1 [file 0c7e98c0bff304d6a118fb0e.xlsx]

## Sheet: Figure 1
	Fig. 1A	GFP	RMP
		1	23.0677
		1	14.7378
		1	18.75
	Fig. 1C	p-IKK			p-P565				p-IκBα
GFP 0	1	1	1		1	1	1		1	1	1
	2.84031	2.43258	2.7918		24.148	44.3999	31.4158		3.82125	4.11553	6.19367
	3.53995	3.97336	3.50981		12.5533	22.611	14.6694		35.5585	42.8593	17.5597
	4.71157	6.0182	5.30283		10.7457	19.261	12.4801		16.9146	19.2965	5.7644
	2.71414	2.91941	2.7602		5.62834	9.88287	5.96615		3.88032	4.16432	6.23363
RMP	1.11615	0.881478	1.0081		0.705853	0.81922	0.655056		1.00114	0.981941	1.23878
	1.90997	1.60323	1.86034		1.044	1.04701	0.563774		2.25382	1.61199	1.81368
	2.45832	2.07378	2.4204		1.63134	1.8624	0.931486		2.46585	2.65378	3.07445
	3.35737	2.98549	3.19371		2.10448	3.24165	1.88788		1.1072	1.12749	1.26935
	2.87301	2.42433	2.80504		2.48521	4.54962	2.98997		0.913859	0.907323	0.86344
	Fig. 1D	GFP BLK			GFP LPS 12h			RMP BLK			RMP LPS 12h
	IL-1β	1.58471	1.04743	0.655197	91.9841	110.661	96.8227	1	0.615572	1.17284	29.5221	32.1617	35.8866
	TNFα	1	1	1	18.1497	27.72	21.2904	2.38833	2.45817	2.528	12.9162	8.35531	10.519
	Fig. 1E	LPS	GFP			RMP					Fig 1H upper	p-IKK			p-P565				p-IκBα
	IL-1b	0h	56.2	47.4	23.1	24.54	40.1	18.4		NC	1	1	1		1	1	1		1	1	1
		12h	2034.55	1830.8	1947.6	942.787	1200.4	1180.7			5.92112	4.71069	5.56813		2.09321	2.26232	2.15388		102.658	89.9215	83.8483
		24h	1171.22	1214.3	1564.6	531.039	706.4	620.4			5.18624	5.24571	3.32815		1.79172	1.89466	1.76801		29.1691	26.132	34.2069
											7.67668	7.83973	4.56973		1.98008	2.07112	1.91351		20.8099	17.9643	21.0639
	TNFα	0h	2.68191	3.7	1.55	2.88528	2.68191	3.2		shRMP	1.2526	0.958451	0.926984		1.02477	0.832842	0.861457		1.0526	0.768221	1.35118
		12h	2229.8	2430	2450	1770.95	1729.81	1423			9.76975	10.4897	10.8703		6.86422	7.97467	7.48543		111.091	123.27	150.77
		24h	2141.09	1910	2228	1583.09	1641.09	1365			11.4625	12.0553	11.4625		6.01561	6.88535	6.76103		220.622	192.9	279.748
											10.3461	11.222	12.1971		5.77628	6.65793	6.48396		141.383	133.026	172.747
	Fig. 1I										Fig 1H below	p-IKK			p-P565				p-IκBα
	NC 0h	NC 12h	shRMP 0h	shRMP 12h						GFP	1	1	1		1	1	1		1	1	1
	1	1.62667	1	3.57435							2.45069	2.2841	2.18696		3.29142	3.10234	3.28456		12.1421	12.378	15.7967
	0.9	1.88159	1.3	2.63974							2.34203	2.251	2.10743		3.22581	3.14691	3.40531		3.52805	3.61041	3.43172
	0.84	1.10371	1.46	2.42771							2.56782	2.55818	2.43238		3.51628	3.06461	2.90219		1.11075	0.923271	0.947768
										RMP	0.872851	0.608118	0.736325		0.991234	0.769024	0.747249		0.976041	1.13043	1.28083
	GFP 0h	GFP 12h	RMP 0h	RMP 12h							0.911536	0.777804	0.704918		1.71614	1.32655	1.60603		1.58727	1.56958	1.8229
	1	2.62667	0.54	1.37435							0.92827	1.02395	1.29829		2.39432	2.05761	2.05298		0.952737	0.911709	1.01488
	0.9	1.88159	0.47	1.23974							1.0775	1.07812	1.15296		1.77222	1.88768	1.74262		0.375866	0.337627	0.332346
	0.84	1.90371	0.72	1.42771
	Fig 1J Top	THP-1 NC BLK	THP-1 NC LPS	THP-1 shRMP BLK	THP-1 shRMP LPS
	IL-1β	1	3.32947	2.79529	7.95196
		0.87	4.42349	2.91968	5.96543
		0.97	2.51752	3.04407	6.9789
	IL-6	1	2.54735	1.86219	5.73731
		0.94	2.65879	1.82364	5.56312
		1.12	2.77022	1.78509	5.38894
	TNFα	1	7.16017	2.56508	17.084
		0.95	9.85553	2.46108	13.5298
		1.14	6.55089	2.35708	14.9756
	CCL2	0.992509	3.02513	1.67	7.08442
		1.07786	3.69661	1.86	6.97172
		0.823063	4.36808	2	8.85901
	CCL5	1	2.91622	2.38833	8.14968
		1.13	3.35531	2.45817	7.72004
		0.94	4.51899	2.528	7.29041
	Fig. 1J Bottom	GFP 0h			GFP 12h			RMP 12h			RMP 12h
	IL-1b	1	1.05926	1.11852	5.8321	6.27407	6.71605	0.5	0.52963	0.559259	3.92346	3.3963	2.86914
	IL-6	0.9675	1.01625	1.065	14.015	13.4688	12.9225	0.3225	0.33875	0.355	6.48	7.74	8.12
	TNFα	0.931	1.175	0.842	8.561	7.7335	9.906	1	1.2	0.97	2.833	3.6165	3.4
	CCL2	1.095	1.2475	0.86	4.83	4.344	3.858	0.85	0.64	0.74	1.863	2.7315	2.64
	CCL5	1.0101	1.2	0.816667	11.8788	11.7652	13.6515	0.342424	0.357071	0.371717	6.11515	5.51667	6.91818

## Sheet: Figure 2
	Fig. 2B	Lyz-Cre- RMPfl/fl			Lyz-Cre+ RMPfl/fl
	Peritoneal macrophage	1	1.05	0.96	0.28971	0.196546	0.230882
	Liver	1	1.03	0.98	0.897102	0.965462	1.03231
		Fig. 2E	p-IKK			p-P565				p-IκBα				Fig. 2F	Lyz2-Cre-			Lyz2-Cre+
	Rmp-WT	1	1	1		1	1	1		1	1	1		Mφ IL-1β 0	24.54	20.1	18.4	26.65	17.4	23.1
		1.02185	0.81483	0.980451		3.48182	3.67079	3.79084		2.82535	3.13127	3.24699		12h	742.787	900.4	580.7	2734.55	2430.8	2347.6
		17.8698	15.0826	14.4398		3.86496	4.0131	4.1725		8.2726	7.75603	7.72323		24h	211.292	264.3	384.6	641.039	906.4	820.4
		9.72941	8.6153	8.35977		2.94415	3.81946	3.01669		3.70444	3.90425	4.31479		Mφ TNFα 0	5.77056	5.36382	6.4	5.36382	7.4	3.1
		4.33777	3.71111	3.41376		2.65475	2.74368	2.75501		6.21876	6.28975	7.15303		12h	3541.89	3459.61	2846	4459.61	4860	4900
		3.65463	3.08007	2.75211		0.310463	3.1359	3.36507		4.90078	5.07319	5.25333		24h	3166.18	3282.18	2730	4282.18	3820	4456
	Rmp-KO	0.753378	0.931646	0.857321		1.17198	1.17447	1.25225		0.796026	0.802589	0.81756		Mφ IL-6 0	1	1.3	1.5	1	2.1	3.1
		4.44597	3.71985	3.82588		6.98349	11.2839	8.84718		7.44471	7.63792	9.47649		12h	84.2	51.1	64.2	160.8	152.7	214.5
		31.0338	27.8871	29.01		7.54892	12.3439	9.86116		39.3105	37.6791	62.085		24h	16.6	9.8	6.6	33.2	82.4	56
		23.3588	20.8541	21.6007		6.17984	5.27289	6.20458		18.8256	21.7521	23.9817
		20.6897	18.3419	19.0753		6.30749	6.10463	7.04884		15.5766	19.8473	21.2866
		19.8616	17.446	17.9073		7.4131	6.12257	6.21883		12.5814	16.3656	17.5709

## Sheet: Figure 3
Fig. 3A				Fig. 3C																		Fig. 3g
Time (hour)	RMP WT	RMP KO		Treatment	WT																		RMP WT
24	1			Saline	0	0	0	0	0	1												Saline	4.77	1.97	2.57	1.49	3.37	2.03
27	1			LPS	3	4	3	5	3	4												LPS	8.3	5.56	8.32	5.18	9.03	7.6
28	1				KO																		RMP KO
28.5	1			Saline	1	1	0	0	0	0												Saline	5.9	3.39	2.54	2.3	3.145	4.42
29	1			LPS	6	5	7	8	5	6												LPS	8.83	13.6	11.3	10.9	13.5	9.8
30	1
31.5	1
31.5	1
33.5	1			Fig 3D	WT						KO											Fig. 3h	WT Saline
48	0			Saline	22.41	7.05	13.22	9.56	5.34	13.4	18.97	7.61	17.54	23.9	28.25	23.31						Neutrophil	0.62	0.69	0.61	0.8	0.9	1.2
48	0			LPS 1h	97.43	158.35	170.32	147.96	75.79	152.95	120.36	206.48	192.17	165.32	170.76	229.71						Macrophage	80.7	75.2	77	75.4	80.4	70.4
48	0			LPS 6h	393.46	320.92	374.38	280.13	344.23	274.08	560.15	470.46	607.83	423.17	369.79	340.6						Monocyte	5.06	9.53	8.01	7.06	8.1	9.5
48	0																						KO Saline
48	0			Fig 3E																		Neutrophil	1.8	2.81	1.6	1.7	0.81	0.9
48	0			Saline	15.47	7.22	17.18	9.29	4.66	11.88	14.09	10.26	7.45	15.51	5.8	22.19						Macrophage	75.6	74.2	74.1	78.4	80	81.2
48	0			LPS 1h	178.24	210.67	92.39	163.72	140.36	123.62	300.8	373.58	156.27	177.64	195.64	205.47						Monocyte	8.6	7.72	6.9	9.7	7.33	10.1
16		1		LPS 6h	307.45	264.98	387.61	397.56	217.36	195.04	623.35	416.47	658.23	558.08	389.52	434.75							WT LPS
18		1																				Neutrophil	3.65	1.94	2.2	1.6	2.795	1.9
19		1		Fig 3f																		Macrophage	58.3	73.9	65.8	62.3	66.1	64.05
20		1		Saline	32.24	11.37	29.85	27.41	26.12	17.37	18.8	34.37	17.28	41.02	15.63	39.52						Monocyte	13	8.86	9.6	7.5	10.93	8.55
21		1		LPS 1h	275.61	361.44	191.48	136.57	172.32	307.98	419.2	365.78	458.49	316.67	310.28	361.58							KO LPS
21		1		LPS 6h	350.95	413.28	223.64	237.21	274.83	281.49	526.15	574.27	353.39	344.06	386.75	296.38						Neutrophil	5.1	6.365	7.63	8.5	5.7325	8.065
23.8		1																				Macrophage	78.7	62.65	46.6	75.4	70.675	61
26		1																				Monocyte	9.86	9.98	10.1	12.1	9.92	11.1
27.5		1
27.5		1
28.5		1
29		1
30		1
48		0
48		0
48		0
48		0

## Sheet: Figure 4
Fig. 4A				Fig. 4C									Fig. 4K
Days	RMP WT	RMP KO	Sham		WT			KO						WT			KO
1.95139	1			Sham	0.166667	0.408248	6	0.166667	0.408248	6			Sham	2.485	0.686319	6	2.605	0.931719	6
6.82292	0			CLP 24h	3.33333	0.516398	6	5.66667	0.516398	6			CLP 24h	6.50667	2.69238	6	14.8258	4.67728	6
1.71181	1				Mean	SD	N	Mean	SD	N				Mean	SD	N	Mean	SD	N
8.0125	0
0.951389	1			Fig.4D	WT			KO					Fig. 4L	WT sham
1.94444	1			Sham	1000	1154.7	6	1000	1154.7	6			Neutrophil	93.8	82.5	88.15	85.33	86.74	86.03
7.94931	1			CLP 24h	202333	70534.2	6	464000	62050.4	6			Macrophage	3.45	6	4.73	2	3.36	2.68
0.791667	1				Mean	SD	N	Mean	SD	N			Monocyte	1.85	0.64	1.25	0.94	1.09	1.02
1.69097	1													KO sham
2.72222	1			Fig. 4E	WT			KO					Neutrophil	78.2	92.1	85.15	88.63	86.89	87.76
1.73958	1			Sham	250	191.485	6	100	115.47	6			Macrophage	4.17	5.27	4.72	3	3.86	3.43
5.94792	1			CLP 24h	20166.7	8196.13	6	36300	12196.1	6			Monocyte	1.96	0.61	1.29	0.95	1.12	1.03
3.47222	1				Mean	SD	N	Mean	SD	N				WT CLP 24h
5.93542	1												Neutrophil	83.6	81.3	88.4	76.8	76.2	75.3
5.50694	1			Fig. 4f	WT			KO					Macrophage	8.8	9.95	6.8	10	14.7	11
4.54	1			Sham	25	20.4124	6	43.75	23.9357	6			Monocyte	1.1	2.67	1.08	7.01	1.35	5.9
6.7	1			CLP 24h	17000	11011.4	6	112917	84810.2	6				KO CLP 24h
9.27	0				Mean	SD	N	Mean	SD	N			Neutrophil	67.8	82	81.9	80.6	75	81
7.36	1												Macrophage	19.5	12.93	13	14.8	16.2	14.2
3.22	1												Monocyte	9.85	1.49	0.14	1.03	6	1.8
2.38	1			Fig. 4G	WT			KO
4.5	1			Sham	35	34.1565	6	30	20	6
1.6		1		CLP 24h	12566.7	6889.3	6	44666.7	7351.83	6
5.12		1			Mean	SD	N	Mean	SD	N
2.74		1
3.55		1
3.54167		1		Fig. 4H	WT			KO
3.33333		1		Sham	0	0	6	0	0	6
1.29167		1		CLP 1h	163.926	79.828	6	292.815	118.824	6
1.45833		1		CLP 24h	200.766	75.2559	6	335.824	108.912	6
0.875		1			Mean	SD	N	Mean	SD	N
1.26181		1
8.14236		0
0.677083		1		Fig. 4I	WT			KO
0.815972		1		Sham	21.2264	19.2647	6	19.8113	13.6276	6
5.57014		1		CLP 1h	191.636	63.6721	6	198.454	82.7922	6
0.940972		1		CLP 24h	2449.69	234.347	6	3025.16	157.145	6
1.73264		1			Mean	SD	N	Mean	SD	N
0.819444		1
2.52083		1
1.77431		1		Fig. 4J	WT			KO
3.34		1		Sham	33.5463	30.7482	6	38.5383	28.106	6
4.29		1		CLP 1h	296.858	75.1947	6	413.525	118.295	6
5.82		1		CLP 24h	562.833	130.943	6	879.925	127.226	6
10			0		Mean	SD	N	Mean	SD	N
10			0
10			0
10			0
10			0
10			0
10			0
10			0
10			0
10			0
10			0
10			0
10			0
10			0
10			0
10			0
10			0
10			0
10			0
10			0

## Sheet: Figure 5-8
	Fig. 5B	BLK			LPS 24h				Fig. 5C	p-IKK				p-P65				Fig. 5C	p-IKK				p-P65				Fig. 5D	p-P65 left				p-P65 right				Fig. 5F	p-IKK				p-P65
	RAW264.7	1	1.04	1.08	0.509927	0.467046	0.624165		MΦ	1.09559	0.940794	1.03038		1.07631	0.974705	1.03345	LPS	1	1	1			1	1	1	Buffer	1	1	1			1	1	1	DMSO	1.08398	0.949926	1.02177			1.28546	0.684462	1.0192
	Mφ	0.946745	1.17713	1.07519	0.517633	0.545991	0.574349			3.82587	4.36844	4.06359		3.34901	3.78208	3.53399		3.18639	4.56654	4.40647			4.835	5.61987	7.94829		8.41859	5.87362	9.06459			6.06248	3.33264	3.21733		4.79155	3.89619	4.37195			8.27838	6.43189	7.44844
										2.38866	2.92013	2.62284		2.77784	2.63327	2.71656		2.05805	2.70675	2.53639			3.65413	5.61595	6.4909		7.38249	4.68295	7.00143			5.5493	4.3812	4.4773		6.74482	5.9963	6.3981			10.9948	8.78692	10.0103
										1.49406	1.15323	1.34224		1.82539	1.26705	1.58124		1.3974	2.1096	2.2047			1.94667	2.57649	2.98879		4.08878	2.73735	4.14959			1.12092	0.791294	0.66363		7.24954	6.95909	7.11776			8.17679	6.57688	7.46753
																	TNF	0.983238	1.29443	1.32968			0.717507	0.938863	0.96561	Ppase	1.26535	1.35055	1.89129			1.26088	0.759388	0.685202	IKK-16	0.976552	1.13611	1.04597			1.2815	0.662787	1.00453
																		3.66376	5.47251	3.25622			2.89572	6.0797	6.00771		2.0157	1.5257	2.2413			1.33845	0.600152	0.784101		1.34922	1.50676	1.41857			2.05589	1.47126	1.79181
	Fig. 6E			Fig. 6F			Fig. 6D											2.57661	3.96167	3.51944			2.88703	4.01702	4.36777		1.81749	1.39125	1.044							1.40842	1.99151	1.6671			1.4495	0.646887	1.08804
	Con	LPS		Con	LPS		RMP WT	RMP S439A										1.7047	1.91517	1.65873			1.91589	3.39532	4.17412		1.92822	1.34648	1.822							2.05712	2.73278	2.35206			1.68054	0.565977	1.1726
	0.117	0.051		0.238	0.102		0.63	0.75
	0.094	0.03125		0.386	0.137		0.55	0.88																												Fig. 5G	p-IKK				p-P65
	0.139	0.0556		0.275	0.076		0.71	0.84																											DMSO	1.0888	0.85049	0.975956			1	1	1
																																				3.22277	2.85015	3.05049			6.05417	4.26618	6.32703
																																				1.57735	1.27328	1.43661			6.93133	5.62902	3.42041
																																				1.49393	1.14365	1.33579			8.80886	7.29214	4.44945
	Fig. 6G																																		TPCA-1	1.35392	0.63444	1.01086			0.739042	0.624283	0.819493
	GFP	GFP+LPS	RMP	RMP+LPS	S439E	S439E+LPS	S439A	S439A+LPS																												1.87275	1.38099	1.63845			3.10732	2.18376	1.88143
	1	1.79322	0.729283	1.32836	0.645321	1.14321	1.14076	2.89943																												1.48166	1.89379	1.6788			3.92414	2.70884	2.12441
	0.771131	1.69349	0.921418	1.20348	0.784326	1.33424	1.72907	3.2801																												1.15833	0.666929	0.920993			1.94687	1.13756	1.01657
	0.863493	1.97237	0.58432	0.975	0.843658	1.60542	1.39474	2.94854
	Fig. 6H
			IKK	IKK	IKK
	GST	IKK	GST	GST-RMP WT	GST-RMP S439A
	423	980	939	2503	1144
	438	1078	1128	2901	1311
	420	1097	1103	3012	1478
	432	1072	972	2681	1198
	Fig. 8C			Fig. 8E
	GFP	RMP		GFP	RMP
	0.125	0.382		0.069	0.273
	0.084	0.233		0.213	0.48
	0.106	0.283		0.282	0.514
	Fig. 8F
	GFP	GFP+LPS	RMP 0h	RMP+LPS	RMP+PP2Ab inhibitor	RMP+PP2Ab inhibitor+LPS
	1	1.863	1.095	3	1	1.531
	0.95	1.7315	1.2475	3.15	1.05	1.6175
	0.9	1.6	1.4	3.3	0.97	1.704
	NC	NC+LPS	shRMP 0h	shRMP+LPS	shRMP+PP2Ab	shRMP+PP2Ab+LPS
	0.9675	2.5	0.805	1.549	0.955	2.433
	1.01625	2.75	0.724	1.4795	0.87	2.11165
	1.065	3	0.643	1.41	0.85	2.312
	Fig. 8G	p-IKK										Fig. 8H	p-IKK
		GFP			RMP			RMP+PP2A i					NC			shRMP			shRMP+PP2Ab
		1	1	1	0.747756	1.44891	1.26747	0.650232	1.50479	1.3664			1	1	1	1.0862	1.23888	1.43123	1.17806	2.1051	1.4818
		4.78583	7.81998	9.50785	1.48452	2.2702	3.39492	5.53253	6.6955	9.30873			10.2277	13.8491	10.0402	17.1708	23.3689	17.4821	7.68505	10.1051	8.71243
		6.00067	10.2471	10.0589	2.45093	3.50587	3.233	5.98204	9.73595	11.23			7.84917	9.30455	6.52699	11.4981	16.3133	10.2415	4.62056	6.57389	5.53435
		5.96563	9.8471	11.5041	3.66921	5.68164	6.08771	3.59852	4.92489	4.9326			6.72817	9.53555	7.15697	5.96059	7.87727	6.85204	5.07524	6.00423	3.42628
		p-P65											p-P65
		GFP			RMP			RMP+PP2A i					NC			shRMP			shRMP+PP2Ab
		1	1	1	1.26626	0.962116	1.22674	1.32486	1.50431	1.37816			1	1	1	1.21404	1.33951	0.830692	0.728366	0.821564	0.755155
		8.75131	9.77557	9.52029	3.85081	3.36694	3.46996	4.91176	7.76477	7.45783			6.26445	6.32717	8.11525	12.5818	10.701	19.8668	5.18095	5.97939	7.35877
		16.1678	20.2195	19.3132	7.41265	3.05896	3.25407	7.26618	5.9781	6.25751			3.54159	3.27418	4.19452	4.88742	4.79225	7.30591	2.83969	3.07059	3.82624
		18.8616	20.4414	22.8702	9.2108	5.40586	5.96387	11.129	9.8223	11.7323			2.85117	3.06833	3.75945	4.22317	5.86627	5.46983	2.94311	3.44296	3.95661

## Sheet: Supplementary Figure
	fig. S1A	RMP WT						RMP KO
	4 week	16.5	17.6	19.4	18.7	18.4	16.7	18.7	16	17	18.6	21.5	17.2
	8 week	23.2	24.1	25.3	24.6	24.1	22.4	23.2	20.8	21.3	23.5	27.4	22.1
	12 week	26	27.4	25.6	26.8	26.9	25.4	26.3	24.9	25.5	28.1	29.2	27
	fig. S1B	WT						KO
	Liver	1140	1240	1080	1310	1170	1200	1220	1180	1160	1270	1090	1300
	Lung	140	170	150	150	140	157	160	160	150	150	140	150
	Spleen	82	83	104	102	104	107	117	123	115	110	96	95
	fig. S1C	WT					KO
	WBC	8.7	7.56	6.48	5.92	8.14	8.52	7.82	9.17	4.34	7.15
	Neu	2.55	1.79	1.07	1.04	3.1	1.83	1.14	3.28	0.86	1.05
	Lym	5.4	5.24	4.96	4.15	4.42	5.89	6.17	5.33	3.02	5.21
	Mon	0.66	0.44	0.36	0.64	0.53	0.71	0.42	0.47	0.37	0.8
	fig. S1D	WT					KO
	ALT	31.24	22.65	20.28	27.52	30.02	33.18	25.97	19.67	23.45	25.4
	AST	40.45	47.63	36.96	30.54	29.87	28.47	42.1	35.65	34.27	31.23
	fig. S2A
	Bone marrow			Spleen
	RMP WT	RMP KO		RMP WT	RMP KO
	1.56	1.79		2.9	3.22
	1.54	1.06		1.73	4.29
	1.38	1.59		1.58	1.56
	1.42	1.56		2.08	3.32
	1.23	1.24		3.28	1.43
	1.61	1.32		2.4	1.75
	fig. S2I	RMP WT						RMP KO
	Neutrophil	80	76.8	77.3	75.5	69.4	76.5	77.3	71.3	79.7	74.8	63.5	69.8
	Macrophage	0.95	1.15	1.59	1.01	1.62	1.56	2.32	2.53	1.27	2.41	6.68	2.35
	Monocyte	17.8	19.2	20.1	22.2	27.8	20.5	18.7	24.4	17.6	20.9	28	25.8
	fig. S2L	RMP WT						RMP KO
	Neutrophil	35.8	38.5	48.3	39	36.5	42	29.1	37.4	44.8	28.7	32.9	35.6
	Macrophage	24.9	14.1	15.3	14.4	15.6	14	25	17	10.5	35.7	21.2	24.1
	Monocyte	32.9	42.2	31.9	41.5	41.4	38	40.7	40.1	40	29.5	40.5	37.4
	fig. S4B										fig.S4G	DMSO			SP600125			SCH772984					DMSO			SP600125			SCH772984					DMSO			SP600125			SCH772984
	Con	15min	30min	45min	60min	90min	120min	180min			p-P65	1	1	1	0.936698	1.05548	0.951589	1.95872	1.24573	1.12579		p-JNK	1	1	1	0.544266	0.646458	1.07334	0.724784	0.828412	1.09218		p-JNK	1	1	1	0.784337	0.858045	1.29782	0.991578	1.11693	1.20213
	1	0.952638	0.907519	0.97942	0.812252	0.76313	0.757858	0.594603				8.68117	6.29545	4.7827	4.95508	7.47534	3.54723	7.08279	7.36431	6.17752			9.27142	10.78	11.2385	4.31847	4.73053	5.75185	10.1612	12.3716	13.1751			12.1398	13.2336	14.366	14.0035	17.9878	20.3296	2.43754	2.68252	3.24966
	1	1.12506	1.03527	1.13288	0.864537	0.752623	0.846745	0.61132				4.68373	2.99688	2.16867	4.99715	3.69573	2.62536	8.3871	7.09898	5.33244			9.475	12.2435	11.7362	3.85287	3.78667	4.43886	8.83907	10.2324	9.13417			14.4276	15.8638	17.7378	13.9455	17.717	19.5066	2.6796	2.65579	2.08651
	1	0.993093	1.02811	1.09429	0.913832	0.835088	0.895025	0.61132				4.04889	2.89169	2.04567	5.23001	6.14482	5.18036	7.93739	8.5924	5.89913			3.55393	3.5738	3.08586	2.2491	2.27447	3.71711	4.85262	5.14173	4.05865			6.20171	6.39458	7.24765	9.92744	11.5383	12.3041	1.12819	1.16811	0.992346
	1	1.02811	1.24833	1.39474	1.06437	0.993093	0.946058	0.726986
	fig.S4H	DMSO			BAY					fig.S4I	DMSO			Rapamycin					fig. S4J	p-IKK				p-p65								fig. S4K	p-IKK				p-p65
	p-P65	1	1	1	0.81632	0.738276	1.11682			p-S6	1	1	1	0.610169	0.58441	0.723994			0	1	1	1		1	1	1						0	1	1	1		1	1	1
		4.52594	4.10547	4.66231	1.39221	1.83918	2.30155				5.28292	5.91636	5.38666	0.539284	0.787188	0.76887			15	34.7608	41.7057	50.6592		4.75497	4.70012	5.64443						15	3.17828	4.61543	4.30425		3.6456	3.43918	5.52238
		18.9161	17.3992	22.3237	3.67238	3.46271	4.40103				8.87822	9.29445	8.55627	1.7228	2.15752	1.75236			30	18.9351	20.1736	22.7474		3.53172	3.40563	3.7778						30	7.48871	8.26428	8.49574		7.38873	7.47353	11.1616
		19.6146	17.3763	20.3105	3.04177	3.80575	4.49711				21.5661	24.7485	22.7698	3.24853	4.04094	4.06801			60	18.1627	16.6813	18.5341		7.93671	8.2715	8.62067						60	15.2273	12.5993	12.6896		5.38308	5.37915	8.91143
	fig.S6B
	p-IKK	GFP		RMP-WT			RMP-S369A			RMPS439A
	1	1	1	1.14359	0.922524	0.826176	0.974263	0.85869	0.637279	1.1328	1.14817	0.79562
	8.6193	9.52724	9.23935	3.65944	3.78639	3.57247	3.83457	3.85465	3.60309	10.8463	11.5599	11.5594
	5.76934	6.16086	5.90164	2.34802	2.27755	1.83206	2.53115	2.39351	2.28997	6.31278	5.85231	5.29711										fig. S5D			fig. S5E			fig.S5F				fig. S5G
																						Con	LPS		Con	LPS		DSMO Ctrl	LPS 30min	LPS 3h		DSMO Ctrl	LPS 30min	LPS 3h
	p-P65	GFP		RMP-WT			RMP-S369A			RMPS439A												0.192	0.109		0.2	0.126		0.89	0.44	0.75		0.92	0.51	0.69
	1	1	1	0.671817	0.671817	0.843085	1.14735	1.14735	0.80147	0.847283	0.847283	0.777622										0.177	0.097		0.17	0.076		0.9	0.6	0.68		1.05	0.6	0.82
	3.39948	3.39948	2.97037	2.61039	2.61039	2.16857	2.30031	2.30031	1.24142	9.14328	9.14328	6.78817										0.256	0.112		0.112	0.057		0.83	0.4	0.78		0.89	0.47	0.66
	9.71688	9.71688	9.59648	3.24868	3.24868	2.80928	3.88875	3.88875	2.80434	11.3121	11.3121	10.8042																0.86	0.51	0.8
	fig.S6B
	p-IKK	GFP		RMP-WT			RMP-S369A			RMPS439A
	1	1	1	1.14359	0.922524	0.826176	0.974263	0.85869	0.637279	1.1328	1.14817	0.79562
	8.6193	9.52724	9.23935	3.65944	3.78639	3.57247	3.83457	3.85465	3.60309	10.8463	11.5599	11.5594
	5.76934	6.16086	5.90164	2.34802	2.27755	1.83206	2.53115	2.39351	2.28997	6.31278	5.85231	5.29711
	p-P65	GFP		RMP-WT			RMP-S369A			RMPS439A
	1	1	1	0.671817	0.671817	0.843085	1.14735	1.14735	0.80147	0.847283	0.847283	0.777622
	3.39948	3.39948	2.97037	2.61039	2.61039	2.16857	2.30031	2.30031	1.24142	9.14328	9.14328	6.78817
	9.71688	9.71688	9.59648	3.24868	3.24868	2.80928	3.88875	3.88875	2.80434	11.3121	11.3121	10.8042
	fig. S6E
	Buffer only	SiRMP IKKβ	GFP IKKβ	RMP IKKβ
	60	522	415	216
	76	570	407	206
	70	632	355	160
	fig. S7B
	DMSO	PP2A inhibitor
	0.85	0.54
	0.8	0.6
	0.91	0.71
